# Supplementary material for: Identification of small molecule compounds targeting the interaction of HIV-1 Vif and human APOBEC3G by virtual screening and biological evaluation
Source: Sci Rep. 2018 May 23;8:8067. doi: 10.1038/s41598-018-26318-3 (PMC5966509; doi:10.1038/s41598-018-26318-3)
Supplement: Supplementary file 2 — Supplemental Material [file 41598_2018_26318_MOESM2_ESM.pdf]

# **Identification of small molecule compounds targeting the interaction of HIV-1 Vif and human APOBEC3G by virtual screening and biological evaluation**

Ling Ma<sup>1</sup>, Zhixin Zhang<sup>1</sup>, Zhenlong Liu<sup>2</sup>, Qinghua Pan<sup>2</sup>, Jing Wang<sup>1</sup>, Xiaoyu Li<sup>1\*</sup>, Fei Guo<sup>3</sup>, Chen Liang<sup>2</sup>, Laixing Hu<sup>1</sup>, Jinming Zhou<sup>1\*</sup>, Shan Cen<sup>1\*</sup>

<sup>1</sup>Institute of Medicinal Biotechnology, Chinese Academy of Medical Sciences & Peking Union Medical College, Beijing, China.

<sup>2</sup>Lady Davis Institute for Medical Research, Jewish General Hospital, McGill University, Montreal, QC, Canada.

<sup>3</sup>Institute of Pathogen Biology, Chinese Academy of Medical Sciences & Peking Union Medical College, Beijing, China.

Correspondence and requests for materials should be addressed to X.Y.L. (email: xiaoyuli@imb.pumc.edu.cn) or J.M.Z. (email: zhou\_jim@imb.pumc.edu.cn) or S.C. (email: shancen@imb.pumc.edu.cn)

## **Table of content**

**Figure S1.** Effect of IMB-301 on expression of endogenous hA3G in both H9 and SupT1 cells

**Figure S2.** The hypermutation rate in viral genome gradually was increased by IMB-301 in dose-dependent manner

**Figure S3.** Octet binding analysis of IMB-293, IMB-350, IMB-945 and hA3G

**Figure S4.** The superimposition of the homology structure of A3G-NTD and NMR structure of A3G-NTD.

**Figure S5.** The predicted binding sites in the homology structure of A3G-NTD and NMR structure of A3G-NTD.

**Figure S6.** IMB-293, IMB-301, IMB-350, and IMB-945 specifically rescue hA3G degradation rather than hA3F in presence of Vif

**Table S1.** The similarity analysis between IMB-301 and other active compounds. The similarity was calculated using Open Babel.

A.

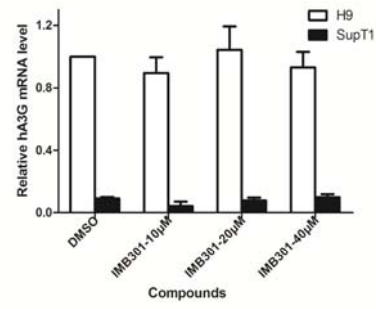

B.

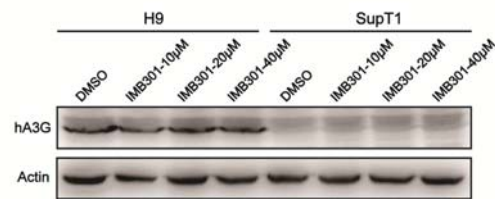

**Figure S1.** H9 and SupT1 cells were seeded in 6-well-plate, and treated with IMB301 at different concentrations (10μM, 20μM, and 40μM). 48 hours later, cells were collected for (A) qRT-PCR and (B) western blots assay. hA3G primers for qRT-PCR: F'-TTACCTGCTTCACCTCCTGG R'-TCATCTAGTCCATCCCAGGG

A.

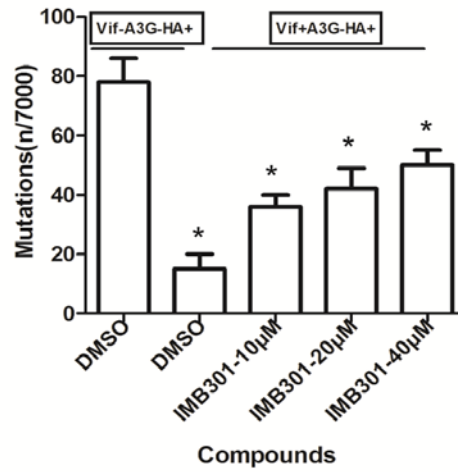

**Figure S2.** 293T cells were co-transfected with 300ng pNL4-3(R-E-)Vif+/-, 200ng VSVG and 200ng hA3G-HA (or pcDNA3.1) in 6-well-plate. After 12 h, the media was changed and IMB-301 was added at different concentrations (10μM, 20μM, 40μM ). 36h later, the supernatants were collected and then used to infect the TZM-bl cells (1×10<sup>5</sup>) in 6-well plates. 48 hours later, total DNA was isolated using DNeasy DNA isolation kit (Qiagen). About 700 bp DNA fragment of HIV-1 was amplified with Taq DNA polymerase (Invitrogen) using the primers HIV-1-F, 5'-AGGCAGCTGTAG ATATTAGCCAC, and HIV-1-R, 5'-GTATGAGGGATCTCTAGCTACCA36. The PCR products were cloned into the TA-cloning vector (Invitrogen). The nucleotide sequences of individual clones from each infected culture sample were determined. \*Statistical significance was determined using the GraphPad Prism software (P<0.05)

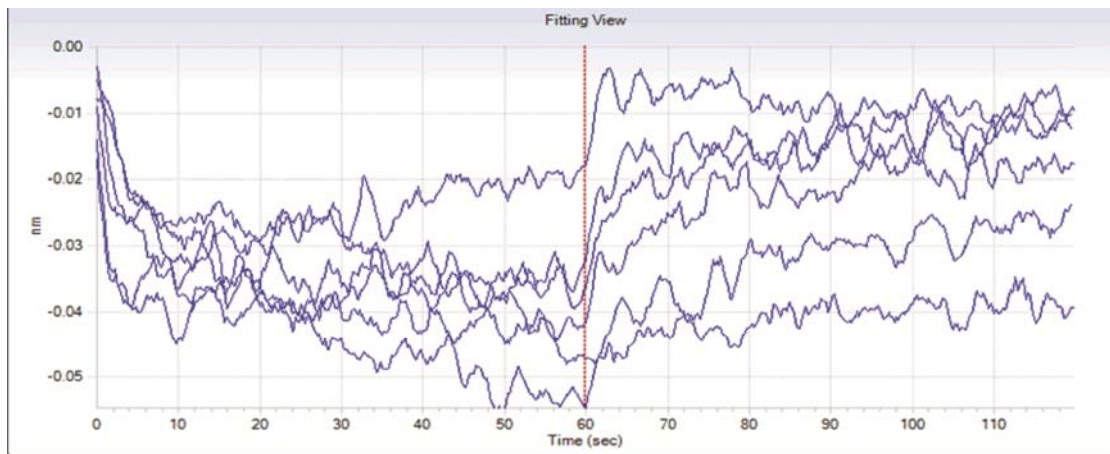

IMB-293

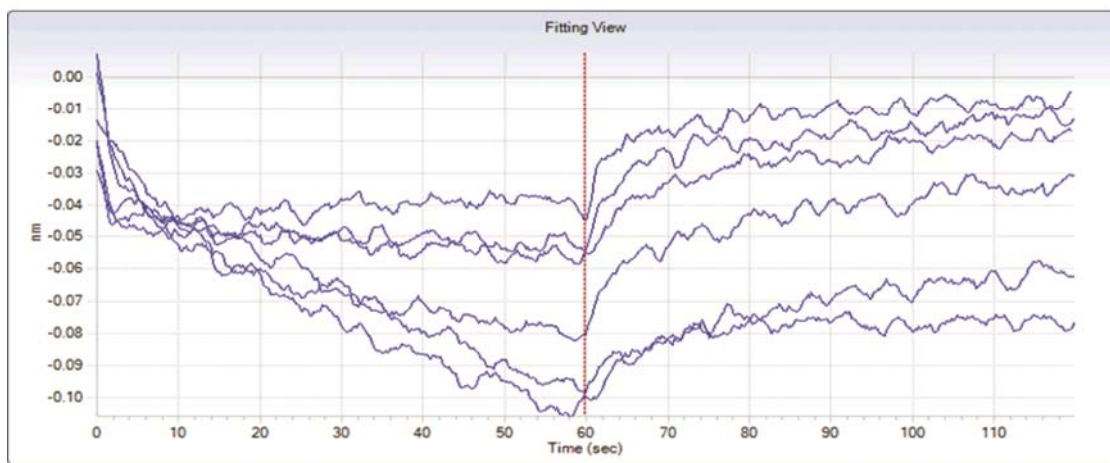

IMB-350

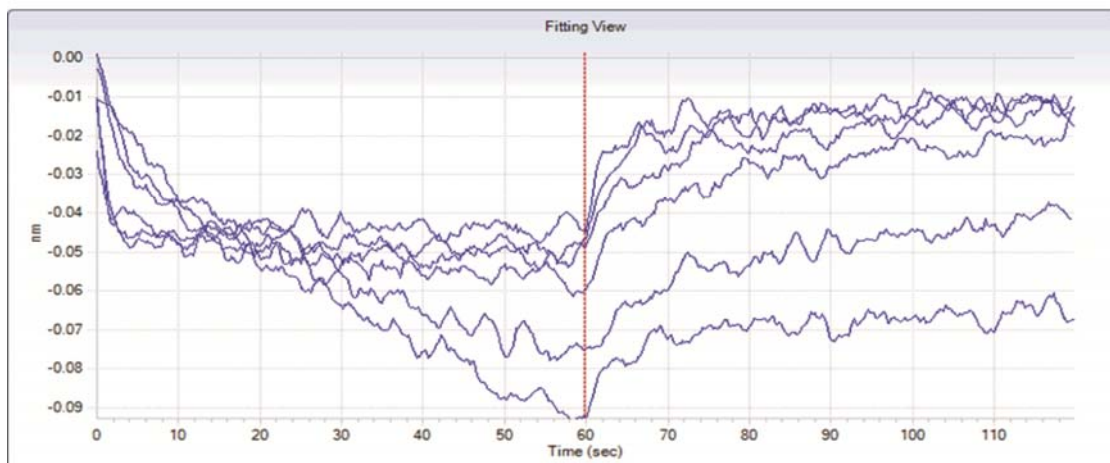

IMB-945

**Figure S3.** Octet binding analysis of IMB-293, IMB-350, IMB-945 and hA3G has been performed respectively. There is no binding signal shown.

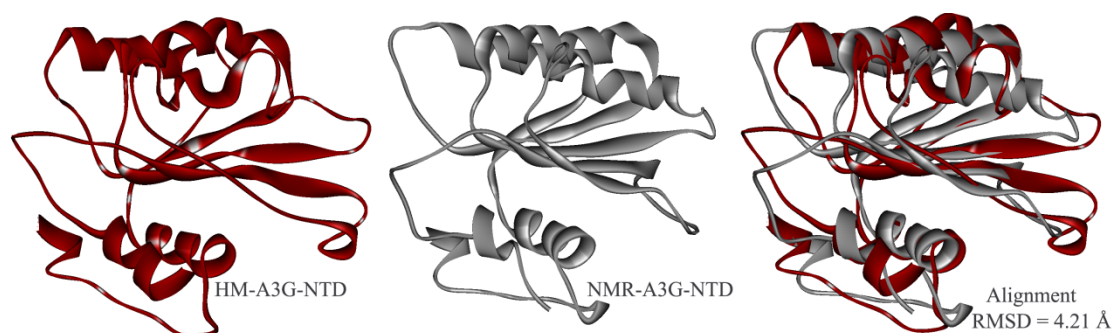

**Figure S4.** The superimposition of the homology structure of A3G-NTD (HM-A3G-NTD) and NMR structure of A3G-NTD (NMR-A3G-NTD) in Discovery Studio gives a RMSD value of 4.21 Å for overall structure.

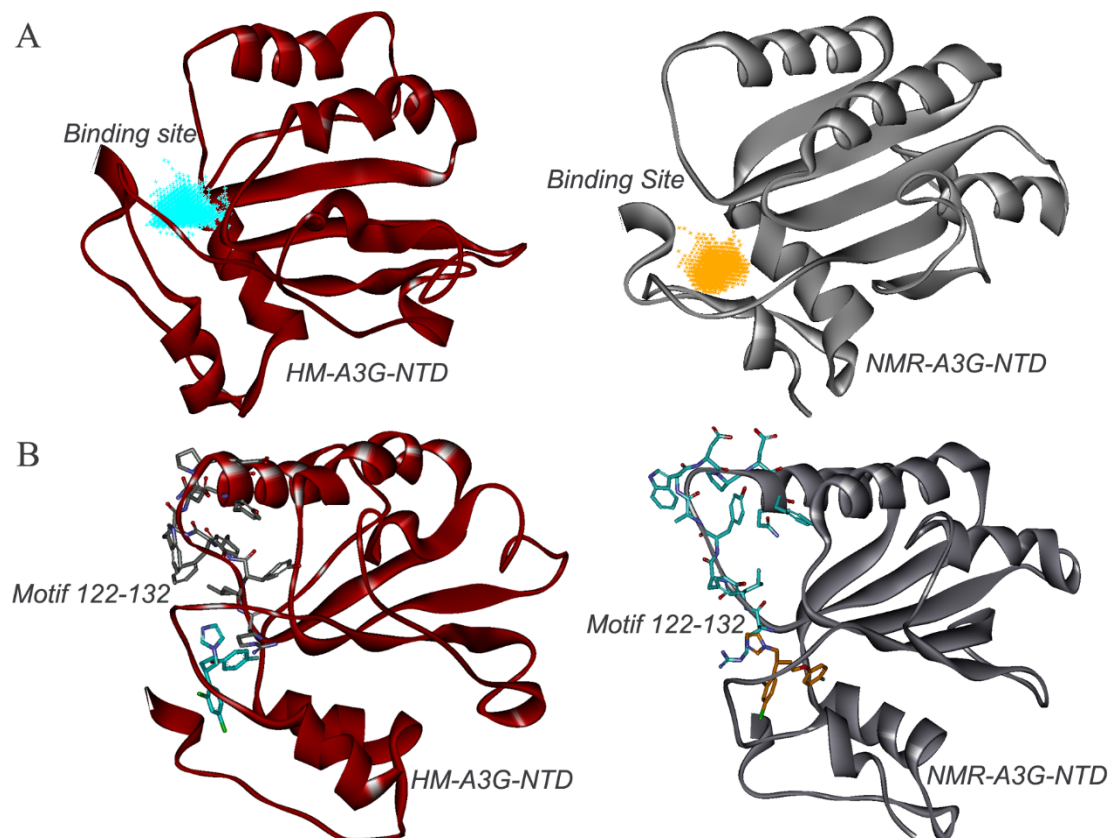

**Figure S5.** The predicted binding sites in A) the homology structure of A3G-NTD (HM-A3G-NTD) and the NMR structure of A3G-NTD (NMR-A3G-NTD) is closed to A3G/Vif interface (Motif 122-132); B) The similar predicted binding mode of IMB-301 in the binding site for the homology structure of A3G-NTD (HM-A3G-NTD) and the NMR structure of A3G-NTD (NMR-A3G-NTD), respectively.

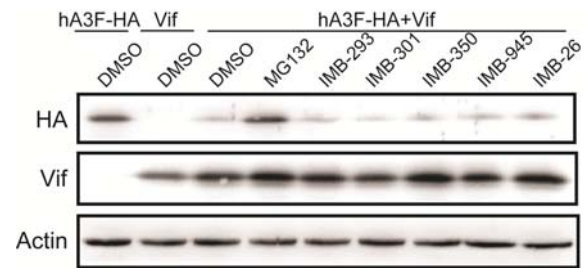

**Figure S6.** IMB-293, IMB-301, IMB-350, and IMB-945 specifically rescue hA3G degradation rather than hA3F in presence of Vif. 293T cells were co-transfected with hA3F-HA and Vif, 12 hours post-transfection, and the compounds were added at the concentration of 10 $\mu$ M. After 48 hours, cell lysates were harvested and proteins were detected by WB.

**Table S1.** The similarity analysis between IMB-301 and other active compounds. The similarity was calculated using Open Babel.

| Name    | Structure                                                                           | Similarity |
|---------|-------------------------------------------------------------------------------------|------------|
| IMB-301 | 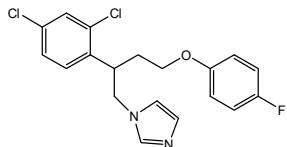   | /          |
| IMB-26  | 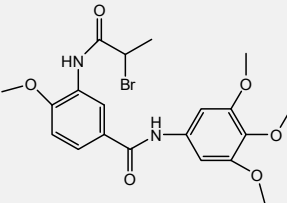   | 0.22       |
| IMB-35  | 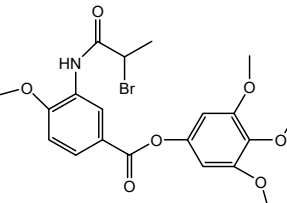   | 0.23       |
| ZB-MA-1 | 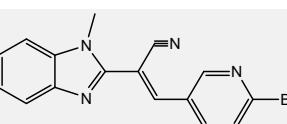  | 0.20       |
| MM-1    | 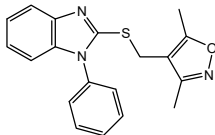 | 0.24       |
| MM-2    | 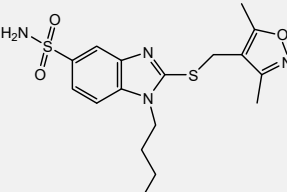 | 0.23       |
| RN-18   | 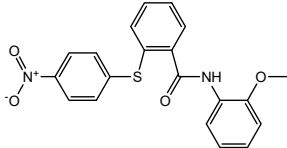 | 0.20       |
| VEC-5   | 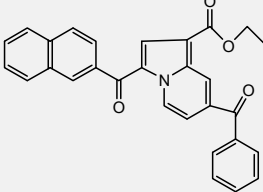 | 0.20       |
